# Supplementary material
Source: PubMed Central journal article supplement (PMC6309035)
Supplement: DS_10.1369_0022155418799957.pdf [file DS_10.1369_0022155418799957.pdf]

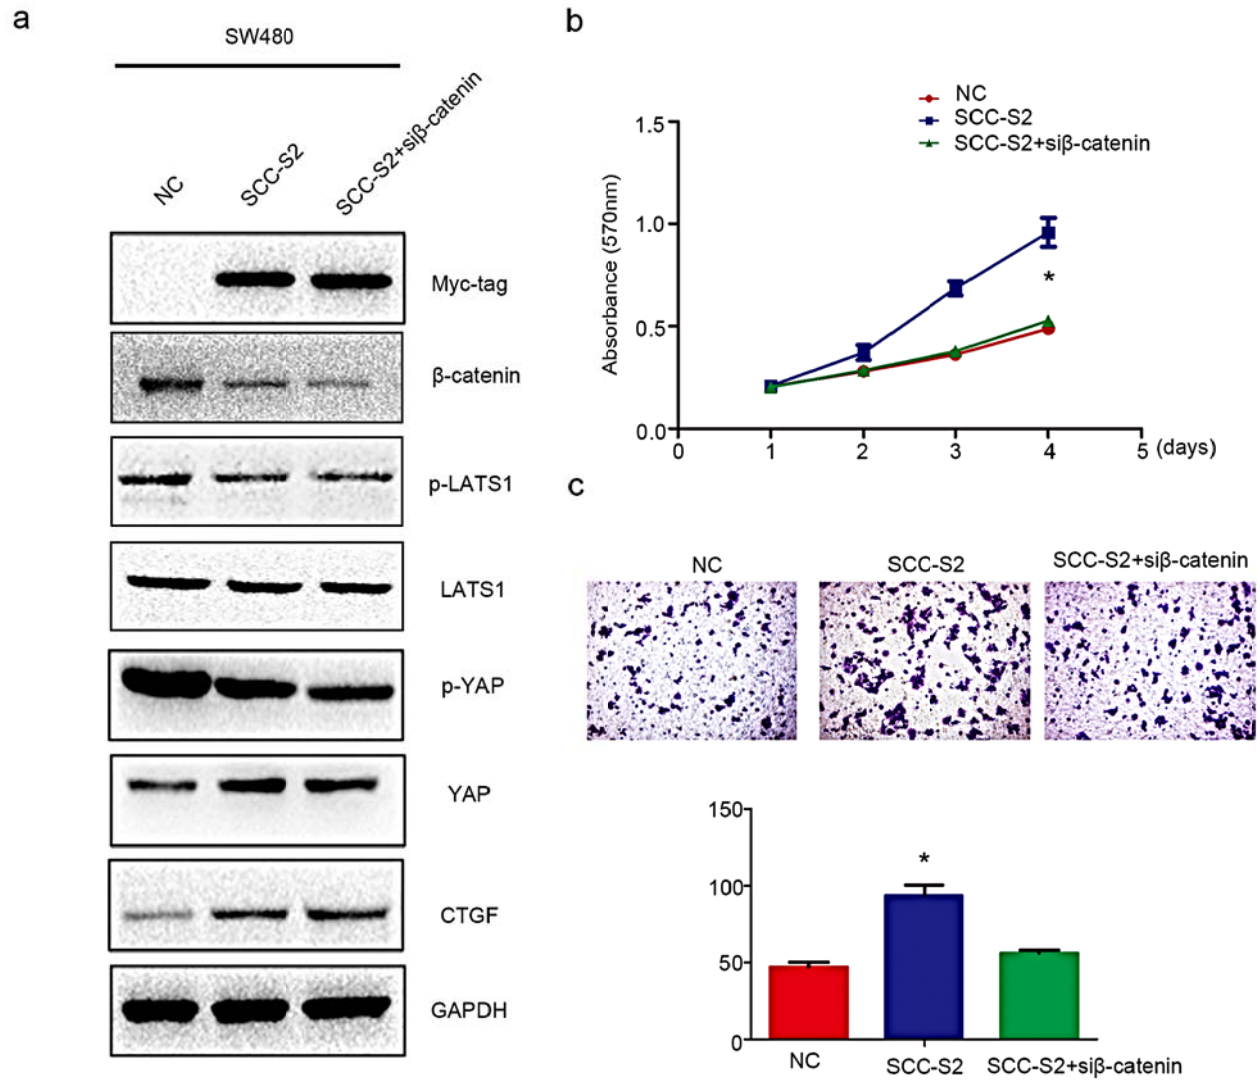

Supplementary Figure 1. The effect on Hippo pathway after overexpression of SCC-S2 with or without depleting  $\beta$ -catenin. (a) When we overexpressed SCC-S2, the expression of p-LATS-1 and p-YAP was downregulated, the expression of YAP and CTGF were upregulated, the protein level of LATS-1 showed no visible change. However, the changes of these proteins were not significantly affected by  $\beta$ -catenin knockdown. Interestingly, the upregulation of cellular proliferation (b) and invasion (c) caused by SCC-S2 overexpression were significantly reversed by  $\beta$ -catenin RNAi. Scale bar=20 $\mu$ m
